1 **Title:** Dissecting the genetic architecture of shoot growth in carrot (*Daucus carota* L.) using a  
2 diallel mating design

3

4 **Authors:** Sarah D. Turner<sup>\*</sup>, Paul L. Maurizio<sup>†,‡</sup>, William Valdar<sup>‡</sup>, Brian S. Yandell<sup>\*,§</sup>, and  
5 Philipp W. Simon<sup>\*,\*\*</sup>

6

7 **Author Affiliations:**

8 <sup>\*</sup>Department of Horticulture, University of Wisconsin-Madison, 1575 Linden Drive, Madison,  
9 WI 53706, USA

10 <sup>†</sup>Curriculum in Bioinformatics and Computational Biology, University of North Carolina, Chapel  
11 Hill, NC 27599, USA

12 <sup>‡</sup>Department of Genetics, University of North Carolina, Chapel Hill, NC 27599

13 <sup>§</sup>Department of Statistics, University of Wisconsin-Madison, 1300 University Avenue, Madison,  
14 WI 53706, USA

15 <sup>\*\*</sup>USDA-ARS Vegetable Crops Research Unit, 1575 Linden Drive, Madison, WI 53706, USA

16 **Title:** Diallel analysis of carrot shoot growth

17

18 **Keywords:** Diallel, Bayesian mixed model, genetic architecture, multiple imputation, heterosis

19

20 **Corresponding Author:**

21 Philipp W. Simon

22 Department of Horticulture, University of Wisconsin-Madison

23 1575 Linden Drive

24 Madison, WI 53706

25 Ph: (608) 262-1248

26 [philipp.simon@ars.usda.gov](mailto:philipp.simon@ars.usda.gov)

27

28 **Article Summary**

29 Breeding for improved competitive ability is a priority in carrot, which suffers yield losses under  
30 weed pressure. However, improvement and in-depth genetic studies for these traits relies on  
31 knowledge of the underlying genetic architecture. This study estimated heritable and non-  
32 heritable components of carrot shoot growth from a diallel mating design using a Bayesian  
33 mixed model. Results directly contribute to improvement efforts by providing estimates of  
34 combining ability, identifying a useful tester line, and characterizing the genetic and non-genetic  
35 influences on traits for improved competitive ability in carrot.

36

## ABSTRACT

37 Crop establishment in carrot (*Daucus carota* L.) is limited by slow seedling growth and  
38 delayed canopy closure, resulting in high management costs for weed control. Varieties with  
39 improved growth habit (i.e. larger canopy and increased shoot biomass) may help mitigate weed  
40 control, but the underlying genetics of these traits in carrot is unknown. This project used a  
41 diallel mating design coupled with recent Bayesian analytical methods to determine the genetic  
42 basis of carrot shoot growth. Six diverse carrot inbred lines with variable shoot size were crossed  
43 in WI in 2014. F1 hybrids, reciprocal crosses, and parental selfs were grown in a randomized  
44 complete block design (RCBD) with two blocks in CA (2014, 2015) and in WI (2015).  
45 Measurements included canopy height, canopy width, shoot biomass, and root biomass. General  
46 and specific combining abilities were estimated using Griffing's Model I. In parallel, additive,  
47 inbreeding, epistatic, and maternal effects were estimated from a Bayesian linear mixed model,  
48 which is more robust to dealing with missing data, outliers, and theoretical constraints than  
49 traditional biometric methods. Both additive and non-additive effects significantly influenced  
50 shoot traits, with non-additive effects playing a larger role early in the growing season, when  
51 weed control is most critical. Results suggest that early season canopy growth and root size  
52 express hybrid vigor and can be improved through reciprocal recurrent selection.

53 **Author Contribution Statement**

54 SDT and PWS conceived and designed this study. SDT performed the crosses, collected  
55 phenotypic data, ran analyses, and wrote the manuscript. PLM and WV contributed to  
56 descriptions of BayesDiallel and assisted with corresponding analyses and interpretations. BSY  
57 helped perform imputation and contributed to the presentation and interpretation of results. PLM,  
58 WV, BSY, and PWS provided comments on the manuscript prior to submission.

59

60 **Acknowledgements**

61 We are grateful to Dr. Shelby Ellison, Guillaume Ramstein, Joe Gage, and Robert Corty for  
62 helpful discussion regarding the content of this manuscript and to Rob Kane for technical  
63 support. This research was supported by the USDA National Institute of Food and Agriculture  
64 under award number 2011-51300-30903 of the Organic Agriculture and Research Extension  
65 Initiative.

66

## INTRODUCTION

67 Carrots are the 7<sup>th</sup> most consumed fresh vegetable in the United States, with an annual  
68 per capita consumption of 3.9 kg (USDA-ERS 2016) and a production value of \$762 million  
69 USD in 2015 (USDA-NASS 2016). In the US, the high alpha- and beta-carotene content in  
70 carrots is the leading source of dietary provitamin A (Block 1994; Simon et al. 2009), which is  
71 essential for healthy immune function, vision, reproduction, and cellular communication  
72 (Institute of Medicine, Food and Nutrition Board 2001; Johnson and Russel 2004; Solomons  
73 2012). Despite the economic and dietary importance of carrots, crop establishment and  
74 productivity remains limited by erratic germination, slow seedling growth, and delayed canopy  
75 closure (Rubatzky et al. 1999). This growth habit, coupled with thin, highly segmented leaf  
76 laminae, competes ineffectively with weeds for nutrients, water, and light, resulting in yield  
77 losses caused by reductions in root size and marketability (Bellinder et al. 1997; Bell et al. 2000).  
78 Furthermore, in a survey of weed competitiveness in 25 crops, carrot had the largest reduction in  
79 yield under weed pressure (van Heemst 1985).

80 To limit yield loss, carrots have an extended critical weed-free period ranging from three  
81 to six weeks, during which chemical and hand weeding are necessary (Swanton et al. 2010).  
82 Hand weeding, while effective, is disruptive to plant growth and requires intensive labor, with  
83 estimated costs exceeding \$4000 USD/ha (Bell et al. 2000). For organic systems, which  
84 constitute 14.4% of carrot acreage in the US (USDA-ERS 2016), hand weeding is typically the  
85 primary method of weed management. Even in conventional systems, few herbicides are labeled  
86 for carrots and can only be applied when plants reach a threshold height (e.g. linuron) or have  
87 five to six true leaves (e.g. metribuzin), by which point weeds have exceeded control stages  
88 (Bellinder et al. 1997).

89 Cultivars with increased weed competitiveness offer a low cost, nonchemical, and  
90 sustainable addition to an integrated weed management program (Pérez de Vida et al. 2006;  
91 McDonald and Gill 2009). Improved competitive ability has been linked to traits that increase  
92 resource allocation, such as height and biomass accumulation, in other densely planted crops  
93 such as maize (Mohammadi 2007; Zystro et al. 2012), rice (Ni et al. 2000; Fischer et al. 2001;  
94 Pérez de Vida et al. 2006), wheat (Lemerle et al. 1996; Murphy et al. 2008), and soybean  
95 (Jannink et al. 2000; da Silva et al. 2013). While improvement of these traits offers a potential  
96 solution for weed management, it is unknown how these traits are inherited in carrot or how they  
97 influence marketability (e.g. root biomass accumulation).

98 The diallel mating design, which consists of pairwise combinations among a group of  
99 inbred parents, is a classical breeding approach to identify informative testers, select desirable  
100 hybrid combinations, and to determine the primary genetic control for complex traits (Hayman  
101 1954a; Hayman 1954b; Gardner and Eberhart 1966). First introduced to plant breeding by  
102 Sprague and Tatum in 1942, the relationships generated in a diallel crossing scheme allow  
103 estimation of general (GCA) and specific combining abilities (SCA), which correspond to the  
104 proportion of additive and non-additive genetic variation, respectively (Sprague and Tatum 1942;  
105 Hayman 1954a; Hayman 1954b; Griffing 1956a; Griffing 1956b). However, the diallel mating  
106 design is underutilized in genetic studies due to resource constraints, the complexity of the  
107 analysis, and untenable assumptions (e.g. no epistasis; independent distribution of genes among  
108 parents) (Baker 1978). These challenges often lead to misinterpretation of the estimates obtained  
109 from diallel analysis and have been the subject of much debate in the literature (Baker 1978;  
110 Hallauer and Miranda 1981; Christie and Shattuck 1992).

111 Several methods of diallel analysis have been described, of which the methodology  
112 proposed by Griffing (1956a) is one of the most common. This method estimates the significance  
113 of GCA, SCA, and reciprocal cross effects using a general linear model approach and can be  
114 modified to test interactions of main effects across environments (Lin et al. 1977; Zhang and  
115 Kang 1997). However, these traditional methods are not robust in addressing common issues  
116 encountered in field experiments, such as missing data, imbalance, and outliers. Missing data for  
117 a single cross is often addressed by list- or pair-wise deletion, thereby substantially reducing the  
118 number of observations and power of the analysis.

119 The challenges of missing data and theoretical ambiguity have been addressed by the  
120 development of Bayesian methods for diallel analysis, which improve biological interpretability  
121 and expand the types of questions that can be addressed (Greenberg et al. 2010; Lenarcic et al.  
122 2012). In this study, we used the methodologies developed by Griffing (1956a) and by Lenarcic  
123 et al. (2012) to elucidate the relative importance of genetic parameters for shoot growth in  
124 carrots. The primary goals of this work were (1) to estimate the inheritance of shoot growth in  
125 carrots as a resource to inform selection strategies, identify useful testers, and assess hybrid  
126 performance and (2) to present an applied framework for the analysis of multiple environment  
127 data using advanced multiple imputation and Bayesian methods.

128

## 129 **MATERIALS AND METHODS**

### 130 **Plant material and measurements**

131 Six inbred lines, with canopy heights ranging from short (31.4 cm) to tall (52.8 cm), were  
132 selected from the USDA-VCRU carrot breeding program and included L6038, L7550, P0159,  
133 Nbh2189, P6139, and B7262 (**Table 1, Figure 1, Figures S1-S2**). Inbred parents were combined

134 in all pairwise combinations for a total of 36 combinations. The resulting F1 progenies,  
135 reciprocals, and parental selfs were grown in a randomized complete block design (RCBD) with  
136 two blocks. Field sites included the Hancock Agricultural Research Station (Hancock, WI, USA;  
137 2015) and the University of California Imperial County Cooperative Extension Station  
138 (Holtville, CA, USA; 2015 & 2016). Carrots were grown on 1.5 meter (m) plots with 1 m  
139 between-row spacing.

140 Measurements of each trait were taken for three biological replicates per plot and are  
141 summarized in **Table 1**. Canopy height (cm) and width (cm) were measured at midseason, 80  
142 days after planting (DAP), and at harvest, 130 DAP. At harvest, fresh and dry biomass (g) were  
143 recorded separately for both shoot and root tissue. For dry biomass, samples were dried at 60°C  
144 in a forced-draft oven until reaching a constant weight. A natural log transformation,  $\ln(x)$ , was  
145 applied to biomass measurements to make the data distribution symmetric and stabilize the  
146 variance.

147

## 148 **Statistical Analyses**

149 Diallel data for each phenotype was analyzed using two complementary approaches: a  
150 traditional analysis after Griffing (1956a), which, owing to its requirement that data is complete  
151 and balanced, was combined here with a multiple imputation procedure; and the recent Bayesian  
152 mixed model decomposition of Lenarcic et al. (2012), performed on the raw (unimputed) data.  
153 These are described in detail below. All analyses were performed in R. 3.2.2 (R Core Team  
154 2016). Data and source code are available at <https://github.com/mishaploid/carrot-diallel>.

155



156 **Multiple imputation of missing data for Griffing's analysis:** To compensate for imbalance,  
157 missing data (**Figure S3**) was imputed using the Multivariate Imputation by Chained Equations  
158 package (R package mice; R/mice) (van Buuren and Groothuis-Oudshoorn 2011), and  
159 specifically using that package's predictive mean matching method (PMM), which is a general  
160 purpose, stochastic regression technique that is suitable for numeric data (Little 1988). The  
161 predictors used for PMM were chosen based on recommendations in the R/mice documentation,  
162 and included male parent, female parent, cross, year, replication, planting density, and numeric  
163 measurements with complete data. The values imputed by the PMM were generated by running  
164 its associated Markov chain Monte Carlo (MCMC) sampler until it reached a stationary  
165 distribution (usually at around 40 iterations; **Figure S4**), and then recording sampled values from  
166 a later iteration (e.g. iteration 70). This was repeated  $m = 50$  times to generate  $m$  imputed data  
167 sets.

168  
169 **Griffing's analysis:** Each of the  $m$  imputed data sets was analyzed using Griffing's Method I,  
170 Model I (1956a), which treats genotypes and blocks as fixed effects and has the base model:

171  
172 
$$Y_{ijk} = \mu + g_j + g_k + s_{jk} + r_{jk} + \varepsilon_{ijk}$$

173  
174 where  $\mu$  is the population mean,  $g_j$  and  $g_k$  are the GCA effects for the  $j$ th and  $k$ th parents,  
175 respectively,  $s_{jk}$  is the SCA effect for the cross of the  $j$ th and  $k$ th parents ( $s_{jk} = s_{kj}$ ),  $r_{jk}$  is the  
176 reciprocal effect for the cross of the  $j$ th and  $k$ th parents ( $r_{jk} = -r_{kj}$ ), and  $\varepsilon_{ijk}$  is the  
177 environmental effect for the  $ijk$ th observation. Analysis was run using the diallele1 function in the  
178 R package plantbreeding (Rosyara 2014), which we modified to include environmental effects

179 and genotype x environment interactions (GxE). The proportion of additive to non-additive  
 180 genetic variation was estimated from the fixed model by comparing the ratio of mean squares for  
 181 GCA ( $\frac{MS_{GCA} - MS_{Error}}{2 \times n}$ ) and SCA ( $MS_{SCA} - MS_{Error}$ ), where  $n$  is the number of parental lines  
 182 (Baker 1978). Values close to unity suggest higher predictability based solely on GCA. Mean  
 183 squares and approximate F-tests were pooled following the method proposed by Raghunathan  
 184 and Dong (2011, unpublished manuscript) (**Table S1**). Estimates for GCA, SCA, and reciprocal  
 185 effects were combined according to Rubin's rules (Rubin 1987) and as implemented in R/mice  
 186 (van Buuren and Groothuis-Oudshoorn 2011).

187

188 **Bayesian mixed model for diallel analysis:** Raw data for each phenotype ( $y_i$ ), measured for  
 189 individuals  $i \in \{1, \dots, n\}$  with female parent  $j$  and male parent  $k$ , were decomposed into additive  
 190 ( $a$ ), inbreeding ( $b$ ), maternal ( $m$ ), symmetric cross-specific ( $v$ ), and asymmetric cross-specific  
 191 effects ( $w$ ), as described by Lenarcic et al. (2012) and Crowley et al. (2014) and implemented as  
 192 a Gibbs sampler in the R package BayesDiallel. Specifically, we used BayesDiallel's full  
 193 unsexed model ('fullu'):

194

$$\begin{aligned}
 195 \quad y_i = & \mu + \underbrace{x_i^T \beta}_{\text{user fixed}} + \underbrace{\sum_{r=1}^R u_i^{(r)}}_{\text{user random}} + \underbrace{a_{j[i]} + a_{k[i]}}_{\text{additive}} + \underbrace{I_{\{j[i]=k[i]\}}(\beta_{\text{inbred}} + b_{j[i]})}_{\text{inbreeding}} + \underbrace{m_{j[i]} - m_{k[i]}}_{\text{maternal}} \\
 196 \quad & + \underbrace{I_{\{j[i] \neq k[i]\}} v_{(jk)[i]}}_{\text{symmetric}} + \underbrace{I_{\{j[i] < k[i]\}} w_{(jk)[i]}}_{\text{asymmetric}} + \varepsilon_i,
 \end{aligned}$$

197

198 where  $j[i]$ ,  $k[i]$  and  $(jk)[i]$  respectively denote the female, male and female-male combination  
 199 relevant to individual  $i$ , each group of effects parameters is modeled from its own random effects

200 distribution, e.g.  $a_j \sim N(0, \tau_a^2)$ , fixed covariates  $x_i$ , and  $R$  additional random-effect components  
201 are included as  $u_i^{(r)} \sim N(0, \tau_r^2), \forall r \in \{1, \dots, R\}$ . Planting density (1-3 scale, 1=low, 3=high) was  
202 included as a fixed covariate to capture linear trends and as a random effect to estimate  
203 deviations from linearity. Year (CA2015, WI2015, CA2016) was also included as a random  
204 effect. This model was fitted in BayesDiallel using a MCMC Gibbs sampler with 5 chains,  
205 10000 iterations, and a burn-in of 1000.

206 Although convention is to model heterosis as a dominance effect, this method instead  
207 models inbred-specific deviations from heterozygote-based predictions; that is, homozygotes (i.e.  
208 parental selfs), which are a minority in the diallel, are treated as a special class. Thus, additive  
209 effects are a dosage effect of parent  $j$  in combination with another sampled parent. Epistasis,  
210 modeled as deviations from additivity, is represented by symmetric and asymmetric effects.  
211 Symmetric effects model differences specific to a given cross, regardless of parental inheritance  
212 and independent of reciprocal effects (i.e. crosses  $jk$  and  $kj$  have the same effect). Asymmetric  
213 effects model deviations from symmetric effects due to differences between reciprocal crosses  
214 (i.e.  $jk$  and  $kj$  have different effects).

215

216 **Diallel variance projection as a heritability-like measure:** In order to report the relative  
217 contribution of each diallel inheritance class to a given phenotype, Crowley et al. (2014)  
218 proposed the diallel variance projection (VarP). This approach uses the posterior predictive  
219 distribution of effects from BayesDiallel to simulate future, complete, perfectly balanced diallels  
220 of the same parental lines. In each simulated dataset, the contribution of each inheritance class  
221 (additive, inbreeding, etc.) is then calculated as its sum of squares (SS) divided by the total  
222 phenotype SS. The resulting proportion, the VarP, is similar to the traditional heritability of

223 Mather and Jinks (1982) and Lynch and Walsh (1998) but with two important differences: 1) it is  
224 explicitly prospective, in that it seeks to describe how much additive effects, say, would impact a  
225 future experiment; and 2) its estimation is more precise, since it is calculated as a function  
226 primarily of the effects parameters (e.g.  $a_1, a_2, \dots, a_6$ ), which are well informed by the data,  
227 rather than of the variance components ( $\tau_a^2, \tau_m^2$ , etc.), which are typically not. VarPs are  
228 calculated from multiple posterior draws leading to a complete posterior distribution of the VarP  
229 for each inheritance class, summarized here as highest posterior credibility intervals. Credibility  
230 intervals that include zero are interpreted as not contributing positive, nonzero information to the  
231 prediction of  $y_i$ , whereas credibility intervals excluding zero provide strong evidence that an  
232 effect is important to the model.

233

234

## RESULTS

### 235 **Imputation of missing data**

236 There was a high incidence of missing data due to variation in seed production and  
237 disease pressure (**Table 1, Figure S3**). A large proportion of missing data occurred in the  
238 WI2015 environment, which was subject to severe infestation by *Alternaria* leaf blight, a fungal  
239 pathogen that causes leaf necrosis and plant death in carrots (Pryor and Strandberg 2001).  
240 Distributions of imputed data matched those expected from observed data when accounting for  
241 environmental variation (**Figures S5-6**).

242

### 243 **Additive and non-additive gene action contributed to observed phenotypes**

244 Most phenotypes were positively correlated and significant at  $\alpha=0.001$ , with the  
245 exception of the ratio for shoot:root biomass with both canopy height and width at 80 DAP

246 **(Figure 2)**. Griffing's analysis revealed significant genotypic differences for all phenotypes  
247 **(Table 2)**, which are reflected in posterior predicted means from BayesDiallel **(Figure 3 a, b;**  
248 **Figures S7-12)**. For all traits, both GCA and SCA contributed significantly to the observed  
249 genotypic variation, suggesting that both additive and non-additive effects are important. The  
250 ratio of GCA to SCA varied for each trait but was less than one for all phenotypes except  
251 shoot:root ratio, indicating a more prominent role of non-additive gene action for most traits  
252 **(Table 2)**. This is reaffirmed by the results from BayesDiallel, in which the highest posterior  
253 density intervals for inbreeding effects were greater and more dispersed than for additive effects  
254 **(Figure 3 c, d; Figures S13-19)**.

255

#### 256 **Inbreeding effects differed across genetic backgrounds**

257 Results from Griffing's analysis indicated that the observed phenotypes, with the  
258 exception of shoot:root ratio, were largely under non-additive genetic control **(Table 2)**, which is  
259 also reflected in the posterior predicted means and highest posterior density intervals from  
260 BayesDiallel **(Figures S7-19)**. These effects are illustrated by canopy height at 130 DAP, for  
261 which inbred lines were an average of 8.4 cm shorter than their hybrid counterparts (overall  
262 inbreeding,  $\beta_{inbred}$ , in **Figure 3**). Additionally, the intensity of inbreeding also varied across  
263 genetic background **(Figure 3, Figures S13-19)**. Relative to heterozygotes, line L6038 had a  
264 minimal net reduction in canopy height of 3.0 cm ( $\beta_{inbred} + b_{j[1]}$ ), while line B7262 had a net  
265 22 cm reduction in canopy height ( $\beta_{inbred} + b_{j[5]}$ ) **(Figure 3)**.

## 266 **Identification of superior parents, hybrids, and testers for applied breeding**

267 GCA estimates were compared to determine the relative performance of each parent  
268 (**Table 3**). Parent L6038 had negative and significant GCA for all traits except canopy height and  
269 width at 80 DAP. Low and significant GCA was also observed in parent L7550 for height (130  
270 DAP), shoot biomass, and the ratio of shoot:root biomass. For canopy height, parents with  
271 positive and significant GCA included Nbh2189 (130 DAP), P6139 (80 and 130 DAP), and  
272 B7262 (130 DAP). Parent Nbh2189 was the only inbred with significant and positive GCA for  
273 canopy width (130 DAP). Parents P0159 and B7262 had high and significant GCA for both  
274 shoot biomass and the ratio of shoot:root biomass. Positive and significant GCA for root biomass  
275 was only observed for parent P0159.

276 GCA estimates largely agree with the results from BayesDiallel, which provided similar  
277 rankings based on posterior predicted means (**Figure 3 a, b; Figures S7-12**) and HPD intervals  
278 (**Fig. 3 c, d; Figures S13-19**). For canopy height (130 DAP), hybrids with parents L6038 and  
279 L7750 were, on average, about 6.5 cm shorter, while hybrids with parents P6139 and B7262  
280 were an average of 5.0 cm taller. (**Figure 3**). The observed and posterior predicted means for  
281 canopy height (130 DAP) also demonstrate relatively higher values for hybrids with parents  
282 P6139 and B7262, as well as lower values for hybrids containing parents L6038 and L7550  
283 (**Figure 3 a, b**).

284 SCA effects were identified as crosses that performed better or worse than expected  
285 based on the GCA values of the contributing parents (**Table 4**). Hybrid Nbh2189 x P6139 had  
286 high SCA for both height and width (80 and 130 DAP). For shoot biomass, the largest SCA was  
287 observed in hybrid Nbh2189 x B7262. Hybrids with high SCA for root biomass included L7550  
288 x B7262, P0159 x Nbh2189, and Nbh2189 x B7262. No significant positive effects were

289 observed for shoot:root ratio. Line Nbh2189 was the most discriminating parent in hybrid  
290 combination for all phenotypes except root biomass, suggesting it can serve as a valuable tester  
291 for shoot growth in applied breeding.

292

### 293 **Non-genetic factors and interactions influenced observed variation**

294 Highly significant reciprocal effects were detected for all traits in Griffing's analysis  
295 (**Table 2**), suggesting parent-of-origin influences phenotypic expression. For increasing height  
296 and width (80 and 130 DAP), lines L6038 and P0159 tended to perform best as female parents  
297 and lines L7550 and B7262 tended to perform best as male parents. Significant increases were  
298 also observed for shoot biomass, root biomass, and shoot:root ratio when line L7550 was used as  
299 a female parent and when lines P0159 and Nbh2189 were used as male parents.

300 Genotype by environment interaction (GxE) was significant for canopy height (80 and  
301 130 DAP), shoot biomass (fresh and dry), and shoot:root ratio (**Table 2**). For corresponding  
302 traits with significant GCAxE, SCAxE, and ReciprocalxE interactions, estimates for each year  
303 are provided in **Tables S2-4**. Significant GCAxE interactions were observed for canopy height  
304 (80 and 130 DAP), shoot biomass, and shoot:root ratio. For canopy height (130 DAP), GCA  
305 ranked consistently negative across environments for parents L6038 and L7550 (**Figure 4**).  
306 Parent Nbh2189 had positive GCA in all environments, but effects were only significant for the  
307 CA2015 and CA2016 locations (**Table S2**). In general, relative rankings for parents remained  
308 consistent across environments, but the ability to distinguish significant effects was diminished  
309 in the WI2015 environment. The performance of parents P0159 and B7262 was notably  
310 inconsistent and fluctuated between negative and positive values of GCA (**Figure 4**). SCAxE  
311 interactions were significant for height (80 DAP), shoot biomass, and shoot:root ratio, but it was

312 still possible to identify consistently high performing hybrids across environments (**Table S3**).  
313 Similarly, significant Reciprocalx $E$  interactions were observed for canopy height (130 DAP) and  
314 fresh shoot biomass (**Table S4**). Differences across replications within a year were not  
315 significant.

316 Additional effects estimated in BayesDiallel included planting density (fixed and  
317 random) and year (random) (**Figure S20**). On average, planting density increased plant height in  
318 a mostly linear fashion, with a greater effect at 80 DAP (5.39 cm) compared to 130 DAP (3.51  
319 cm) (**Figure 5**). Similarly, year had a greater influence at 80 DAP than at 130 DAP, with the  
320 highest mean in the WI2015 season and the lowest mean in the CA2016 season (**Figure 5**).

321

## 322 **Genetic architecture varied across traits and over developmental time**

323 Although most correlations among phenotypes ranged from moderate ( $r > 0.3$ ) to high  
324 ( $r > 0.5$ ) (**Figure 2**), genetic architecture varied substantially by trait and across developmental  
325 time (**Figure 6**). For canopy height and width, the GCA/SCA ratio increased approximately  
326 three-fold from 80 to 130 DAP, demonstrating a higher proportion of non-additive variation  
327 early in the growing season (**Table 2**). Results from BayesDiallel exhibit a similar relationship,  
328 with overall inbreeding ( $\beta_{inbred}$ ) explaining more variation than additive effects for height and  
329 width at 80 DAP (**Table 6, Figure 6**).

330 As described by Crowley et al. (2014), the variance projection of the additive diallel  
331 inheritance class,  $\text{VarP}[a]$ , can be likened to narrow sense heritability ( $h^2$ ). Traits with significant  
332 additive effects included canopy height at 80 DAP ( $\text{VarP}[a] = 0.22$ ), canopy height at 130 DAP  
333 (0.43), canopy width at 130 DAP (0.23), shoot biomass (0.31), root biomass (0.12), and  
334 shoot:root ratio (0.29) (**Table 6, Figure 6**).



335           The influence of non-additive variation was largely due to overall inbreeding, which  
336 contributed significantly to canopy height at 80 DAP ( $\text{VarP[B]} = 0.20$ ), canopy width at 80 DAP  
337 (0.21) and at 130 DAP (0.14), shoot biomass (0.09), and root biomass (0.27) (**Table 6, Figure**  
338 **6**). However, parent-specific inbreeding effects, symmetric epistasis, and asymmetric epistasis  
339 did not contribute significantly to the predicted phenotypes (**Table 6, Figure 6**). While parent-  
340 of-origin is not a genetic effect, it did explain variation for canopy height at 80 DAP ( $\text{Var[m]} =$   
341 0.07) and 130 DAP (0.04), canopy width at 80 DAP (0.07) and 130 DAP (0.02), and shoot  
342 biomass (0.05) (**Table 6, Figure 6**).

343

344

## DISCUSSION

### 345 **Primary gene action**

346           In this study, we estimated genetic, parent-of-origin, and environmental effects on carrot  
347 growth traits for six carrot inbred lines and their combinations in a 6x6 diallel framework.  
348 Significant genetic variation contributed to all carrot growth attributes, suggesting that there is  
349 potential to improve these traits in carrot.

350           Apart from canopy width at 80 DAP, all phenotypes had some level of predictability  
351 based on inbred performance, as evidenced by the presence of non-zero additive effects. Traits  
352 with high additivity included canopy height (130 DAP) and shoot biomass, both of which are  
353 well documented as highly heritable polygenic traits that play a fundamental role in plant fitness  
354 and adaptation (Khush 2001; Meyer et al. 2004; Peiffer et al. 2014).

355           For the parental lines in this study, we observed varying sensitivity to inbreeding, which  
356 could be due to genetic divergence and/or differing levels of prior inbreeding (East 1936;  
357 Birchler et al. 2003). This matches expectations based on the biological constraints of

358 outcrossing in carrot, which has putative susceptibility to inbreeding depression (Simon 2000).  
359 Consequently, hybrid vigor was evident for canopy height (80 DAP), canopy width (80 DAP),  
360 and root biomass, which had high proportions of non-additive genetic variation and significant  
361 estimates of inbreeding, suggesting that causative loci may have heterozygote advantage  
362 (Charlesworth and Willis 2009). This result coincides with widespread evidence of heterosis in  
363 plants, whereby hybrids demonstrate increased developmental speed and greater biomass relative  
364 to their inbred parents (East 1936; Birchler et al. 2003; Meyer et al. 2004), and agrees with  
365 previous observations of hybrid vigor for root weight in carrot (Simon et al. 1982).

366

### 367 **Breeding strategies**

368 With discovery of cytoplasmic male sterility (CMS) in carrot (Welch and Grimball  
369 1947), breeding strategies transitioned from selection in open-pollinated populations to an  
370 inbred-hybrid system, thereby improving crop uniformity and vigor (Peterson and Simon 1986).  
371 We expect that traits with a significant contribution of inbreeding, such as canopy height (80  
372 DAP), canopy width (80 DAP), and root biomass, will be responsive to commonly used hybrid  
373 breeding strategies in carrot, such as reciprocal recurrent selection. Alternatively, selection for  
374 traits with high additivity, such as canopy height (130 DAP), canopy width (130 DAP), and  
375 shoot biomass, may allow more rapid genetic gain while indirectly selecting for positively  
376 correlated traits under non-additive control. For all phenotypes in this study, we identified  
377 promising parental lines and hybrids for use in applied breeding. Additionally, line Nbh2189 was  
378 notable as a favorable tester for future breeding efforts on shoot growth.

379 Accounting for genotype by environment interaction (GxE) is especially important in  
380 biennial crops like carrot, as breeding programs rely on winter nurseries to achieve an annual

381 breeding cycle (Simon and Goldman 2007). We conducted trials in CA and WI, which are two of  
382 the leading carrot production regions and representative of common, but contrasting, breeding  
383 environments. In general, significant GxE interactions did not affect the ability to identify high  
384 and low rankings among parents and hybrids. Thus, we anticipate that environmental differences  
385 are important, but should have a minimal impact on selection efforts.

386

### 387 **Source-sink relationships**

388 Biomass partitioning between the shoot and root is a major consideration in carrot  
389 breeding and has been extensively studied, both in a breeding and an ecological context (Barnes  
390 1979; Currah and Thomas 1979; Hole et al. 1983; Thomas et al. 1983; Hole and Dearman 1991).  
391 The ideotype for carrot shoot growth is rapid initial growth that plateaus following canopy  
392 closure, simultaneously reducing the critical weed free period and promoting taproot  
393 development. Equally important is avoiding growth habits with large, dense canopies, which  
394 foster a microclimate that is conducive to the development of foliar diseases (Simon et al. 2008).

395 Consistent with findings by Hole et al (1983), we found a strong linear relationship  
396 between the log transforms of shoot and root biomass ( $r = 0.69$ ,  $P < 0.001$ ). However, the ratio of  
397 shoot:root biomass had a wide range across parents (0.19-0.72), providing evidence that high  
398 shoot biomass is not necessary to produce roots with high biomass, and vice versa.

399 Previous work has demonstrated rapid and early acquisition of dry matter in carrot  
400 storage roots, with the taproot constituting 42% of the plant dry weight at 67 days after sowing  
401 (Benjamin and Wren 1978). Interestingly, our results demonstrate that canopy height and width  
402 at 80 DAP were negatively correlated with the ratio of shoot:root biomass ( $r = -0.26$  and  $-0.29$ ,  
403 respectively,  $P < 0.001$ ) and positively correlated with root biomass at harvest ( $r = 0.58$  and  $0.55$ ,

404 respectively,  $P < 0.001$ ). Conversely, canopy height at harvest (130 DAP) was positively  
405 correlated with shoot:root ratio ( $r = 0.39$ ,  $P < 0.001$ ) and not significantly correlated with root  
406 biomass ( $r = 0.10$ ,  $P = 0.18$ ). This suggests that early shoot growth is important for root biomass  
407 accumulation and agrees with previous conclusions that these traits are subject to hybrid vigor.

408

#### 409 **Method of analysis**

410 When applied appropriately, traditional diallel analysis provides valuable information on  
411 combining abilities for parental lines and the underlying gene action for complex traits (Griffing  
412 1956a). However, the benefits of diallel mating designs are often overshadowed by practical and  
413 theoretical constraints of the analysis. The requirement for complete, balanced data is especially  
414 restrictive, particularly in crops with poor seed set and limited availability of inbred lines. In this  
415 study, we performed classical evaluation using Griffing's Method I and a modern analysis using  
416 a general Bayesian approach (BayesDiallel). Both methods provided similar conclusions  
417 regarding primary gene action, parental rankings, and hybrid performance.

418 Although the underlying model is more complex, BayesDiallel provided numerous  
419 practical advantages over Griffing's analysis, which are thoroughly discussed by Lenarcic et al  
420 (2012). Of relevance in this experiment was the robustness of BayesDiallel to missing data,  
421 which was a substantial challenge when applying Griffing's model and is pervasive in field  
422 experiments. For the latter, we chose to address missing data using multiple imputation, which  
423 produces a set of plausible values to replace missing information (Rubin 1987). However, there  
424 are several caveats and compromises regarding multiple imputation in that there are inadequate  
425 or vague diagnostics and, although simple in principle, methods to pool multi-factor ANOVA  
426 results are often vague or are not widely accessible (van Ginkel and Kroonenberg 2014; Grund et

427 al. 2016). Furthermore, the ability of BayesDiallel to analyze data sets in the presence of missing  
428 data allows breeders to leverage data from partial diallels, which are often generated by proxy in  
429 a breeding program.

430 A notable advantage of BayesDiallel was the option to add covariates for year and  
431 planting density as random and fixed effects. Posterior distributions for year matched  
432 expectations based on observed data, with higher means observed in WI2015 compared to  
433 CA2015 and CA2016. The inclusion of planting density was especially advantageous and  
434 matched expectations from previous studies, which demonstrated significant effects of planting  
435 density on canopy height and biomass partitioning in carrot (Bleasdale 1967; Benjamin and  
436 Sutherland 1992; Traka-Mavrona 1996; Li et al. 1996)

437 Precise estimates of heritability are useful when determining which breeding strategy will  
438 result in the most genetic gain. While it is possible to estimate heritability through variance  
439 component decomposition using Griffing's model II, this method requires that the parents are  
440 selected from a random mating population (at least according to its traditional interpretation; see  
441 discussion in Lenarcic et al. 2012), and is not accompanied by a measure of estimation  
442 uncertainty. As an alternative, the diallel variance projection (VarP) in BayesDiallel has benefit  
443 for applied breeding by (1) describing how several inheritance classes will influence future  
444 experiments composed of the same parents, and (2) providing a 95% credibility interval as a  
445 measure of uncertainty, which affords more flexibility when designing future experiments and  
446 estimating potential for genetic gain.

447

448

## 449 **Conclusions**

450           The rise of sustainable agriculture has tasked breeders to develop cultivars with improved  
451 weed competitive ability. Using traditional and modern approaches, we analyzed diallel data to  
452 describe the quantitative inheritance of previously uncharacterized traits in carrot, which have  
453 been demonstrated to confer improved competitive ability in other crops. However, future  
454 trialing for weed competitive ability in carrot will be essential to validate the utility of these  
455 traits, to determine the underlying mechanism of competitive ability (i.e. tolerance or  
456 suppression), and to assess relative fitness costs (e.g. trade-offs with yield).

457           Results from this study support applied breeding efforts for carrot shoot growth in  
458 numerous ways, most notably through the quantification of inbred performance, the  
459 identification of a useful tester line (NbH2189), and the assessment of potential hybrid  
460 combinations. Furthermore, the detailed characterization of the inbred parents in this study  
461 provides a foundation for the development of a multi-parental advanced generation intercross  
462 (MAGIC) population in carrot, which will facilitate future in-depth genetic studies (Huang et al.  
463 2015).

464           Lastly, we demonstrate the utility of the BayesDiallel framework for modeling heritable  
465 and non-heritable components of carrot phenotypes. This example will make BayesDiallel more  
466 accessible as a resource in the plant breeding community to maximize the potential of diallel  
467 experiments, especially in under-resourced crops.

468

## LITERATURE CITED

- 469 Baker RJ (1978) Issues in diallel analysis. *Crop Sci* 18:533. doi:  
470 10.2135/cropsci1978.0011183X001800040001x
- 471 Barnes A (1979) Vegetable plant part relationships. II. a quantitative hypothesis for shoot/storage  
472 root development. *Ann Bot* 43:487–499.
- 473 Bell CE, Boutwell BE, Ogbuchiekwe EJ, McGiffen ME (2000) Weed control in carrots: the  
474 efficacy and economic value of linuron. *HortScience* 35:1089–1091.
- 475 Bellinder R, Kirkwyland J, Wallace R (1997) Carrot (*Daucus carota*) and weed response to  
476 linuron and metribuzin applied at different crop stages. *Weed Technol* 11:235–240.
- 477 Benjamin LR, Sutherland RA (1992) Control of mean root weight in carrots (*Daucus carota*) by  
478 varying within- and between-row spacing. *J Agric Sci* 119:59–70. doi:  
479 10.1017/S0021859600071549
- 480 Benjamin LR, Wren MJ (1978) Root development and source-sink relations in carrot, *Daucus*  
481 *carota* L. *J. Exp. Bot.* 29:425-433
- 482 Birchler JA, Auger DL, Riddle NC (2003) In search of the molecular basis of heterosis. *Plant*  
483 *Cell* 15:2236–2239. doi: 10.1105/tpc.151030
- 484 Bleasdale JK (1967) The relationship between the weight of a plant part and total weight as  
485 affected by plant density. *J Horticult Sci* 42:51–8.
- 486 Block G (1994) Nutrient sources of provitamin A carotenoids in the American diet. *Am J*  
487 *Epidemiol* 139:290–293.
- 488 Charlesworth D, Willis JH (2009) The genetics of inbreeding depression. *Nat Rev Genet*  
489 10:783–796. doi: 10.1038/nrg2664
- 490 Christie BR, Shattuck VI (1992) The diallel cross: design, analysis, and use for plant breeders.  
491 In: Janick J (ed) *Plant breeding reviews*. John Wiley & Sons, Inc., Hoboken, NJ, pp 9–36
- 492 Crowley JJ, Kim Y, Lenarcic AB, et al (2014) Genetics of adverse reactions to haloperidol in a  
493 mouse diallel: a drug-placebo experiment and Bayesian causal analysis. *Genetics*  
494 196:321–347. doi: 10.1534/genetics.113.156901
- 495 Currah IE, Thomas TH (1979) Vegetable plant part relationships. III. modification of carrot  
496 (*Daucus carota* L.) root and shoot weights by gibberellic acid and daminozide. *Ann Bot*  
497 43:501–511.
- 498 da Silva AF, Galon L, Aspiazú I, et al (2013) Weed management in the soybean crop. In: El-  
499 Shemy HA (ed) *Soybean - pest resistance*. InTechOpen. doi: 10.5772/54596
- 500 East EM (1936) Heterosis. *Genetics* 21:375–397.

- 501 Fischer AJ, Ramirez HV, Gibson KD, Da Silveira Pinheiro B (2001) Competitiveness of  
502 semidwarf upland rice cultivars against palisadegrass (*Brachiara brizantha*) and  
503 signalgrass (*B. decumbens*). *Agron J* 93:967–973.
- 504 Gardner CO, Eberhart AS (1966) Analysis and interpretation of the variety cross diallel and  
505 related populations. *Biometrics* 22:439–452.
- 506 Greenberg AJ, Hackett SR, Harshman LG, Clark AG (2010) A hierarchical Bayesian model for a  
507 novel sparse partial diallel crossing design. *Genetics* 185:361–373. doi:  
508 10.1534/genetics.110.115055
- 509 Griffing B (1956a) Concept of general and specific combining ability in relation to diallel  
510 crossing systems. *Aust J Biol Sci* 9:463–493.
- 511 Griffing B (1956b) A generalised treatment of the use of diallel crosses in quantitative  
512 inheritance. *Heredity* 10:31–50.
- 513 Grund S, Lüdtke O, Robitzsch A (2016) Pooling ANOVA results from multiply imputed  
514 datasets: a simulation study. *Methodology* 12:75–88. doi: 10.1027/1614-2241/a000111
- 515 Hallauer AR, Miranda JB (1981) Hereditary variance: mating designs. In: *Quantitative genetics*  
516 *in maize breeding*, 2nd edn. Springer New York, New York, NY, pp 45–83
- 517 Hayman BI (1954a) The analysis of variance of diallel tables. *Biometrics* 10:235. doi:  
518 10.2307/3001877
- 519 Hayman BI (1954b) The theory and analysis of diallel crosses. *Genetics* 39:789–809.
- 520 Hole CC, Barnes A, Thomas TH, et al (1983) Dry matter distribution between the shoot and  
521 storage root of carrot (*Daucus carota* L.) I. comparison of varieties. *Ann Bot* 51:175–  
522 187.
- 523 Hole CC, Dearman J (1991) Carbon economy of carrots during initiation of the storage root in  
524 cultivars contrasting in shoot:root ratio at maturity. *Ann Bot* 68:427–434.
- 525 Huang BE, Verbyla KL, Verbyla AP, et al (2015) MAGIC populations in crops: current status  
526 and future prospects. *Theor Appl Genet* 128:999–1017. doi: 10.1007/s00122-015-2506-0
- 527 Institute of Medicine, Food and Nutrition Board (2001) Dietary reference intakes for vitamin A,  
528 vitamin K, arsenic, boron, chromium, copper, iodine, iron, manganese, molybdenum,  
529 nickel, silicon, vanadium, and zinc. National Academy Press, Washington, DC
- 530 Jannink J-L, Orf JH, Jordan NR, Shaw RG (2000) Index selection for weed suppressive ability in  
531 soybean. *Crop Sci* 40:1087–1094.
- 532 Johnson E, Russel R (2004) Beta-carotene. In: Coates P, Blackman M, Cragg G, et al. (eds)  
533 *Encyclopedia of dietary supplements*, 2nd edn. Marcel Dekker, New York, NY, pp 81–87



- 534 Khush GS (2001) Green revolution: the way forward. *Nat Rev Genet* 2:815–822. doi:  
535 10.1038/35093585
- 536 Lemerle D, Verbeek B, Cousens RD, Coombes NE (1996) The potential for selecting wheat  
537 varieties strongly competitive against weeds. *Weed Res* 36:505–513. doi:  
538 10.1111/j.1365-3180.1996.tb01679.x
- 539 Lenarcic AB, Svenson KL, Churchill GA, Valdar W (2012) A general Bayesian approach to  
540 analyzing diallel crosses of inbred strains. *Genetics* 190:413–435. doi:  
541 10.1534/genetics.111.132563
- 542 Li B, Watkinson AR, Hara T (1996) Dynamics of competition in populations of carrot (*Daucus*  
543 *carota*). *Ann Bot* 78:203–214.
- 544 Lin C, Binns M, Thompson B (1977) The use of regression methods to study genotype-  
545 environment interactions. *Heredity* 38:309–319.
- 546 Little RJA (1988) Missing-data adjustments in large surveys. *J Bus Econ Stat* 6:287–296. doi:  
547 10.2307/1391878
- 548 Lynch M, Walsh B (1998) *Genetics and analysis of quantitative traits*. Sinauer, Sunderland, MA
- 549 Mather K, Jinks J (1982) *Biometrical genetics: The study of continuous variation*, 3rd edn.  
550 Chapman Hall, London UK
- 551 McDonald GK, Gill GS (2009) Improving crop competitiveness with weeds: adaptations and  
552 trade-offs. In: *Crop physiology*. Academic Press, San Diego, pp 449–488
- 553 Meyer RC, Törjék O, Becher M, Altmann T (2004) Heterosis of biomass production in  
554 *Arabidopsis*. Establishment during early development. *Plant Physiol* 134:1813–1823. doi:  
555 10.1104/pp.103.033001
- 556 Mohammadi GR (2007) Growth parameters enhancing the competitive ability of corn (*Zea mays*  
557 L.) against weeds. *Weed Biol Manag* 7:232–236. doi: 10.1111/j.1445-6664.2007.00261.x
- 558 Murphy KM, Dawson JC, Jones SS (2008) Relationship among phenotypic growth traits, yield  
559 and weed suppression in spring wheat landraces and modern cultivars. *Field Crops Res*  
560 105:107–115. doi: 10.1016/j.fcr.2007.08.004
- 561 Ni H, Moody K, Robles RP, et al (2000) *Oryza sativa* plant traits conferring competitive ability  
562 against weeds. *Weed Sci* 48:200–204. doi: 10.1614/0043-  
563 1745(2000)048[0200:OSPTCC]2.0.CO;2
- 564 Peiffer JA, Romay MC, Gore MA, et al (2014) The genetic architecture of maize height.  
565 *Genetics* 196:1337. doi: 10.1534/genetics.113.159152
- 566 Pérez de Vida FB, Laca EA, Mackill DJ, et al (2006) Relating rice traits to weed competitiveness  
567 and yield: a path analysis. *Weed Sci* 54:1122–1131. doi: 10.1614/WS-06-042R.1

- 568 Peterson C, Simon PW (1986) Carrot breeding. In: Bassett MJ (ed) Breeding vegetable crops.  
569 AVI Publishing, Westport, CT,
- 570 Pryor BM, Strandberg JO (2001) *Alternaria* leaf blight of carrot. In: Davis RM, Raid RN (eds)  
571 Compendium of Umbelliferous crop diseases. American Phytopathological Society Press,  
572 St. Paul, MN,
- 573 R Core Team (2016) R: A Language and Environment for Statistical Computing. R Foundation  
574 for Statistical Computing, Vienna, Austria
- 575 Rosyara U (2014) plantbreeding: Analysis and visualization of data from plant breeding and  
576 genetics experiments. <http://R-Forge.R-project.org/projects/plantbreeding/>
- 577 Rubatzky VE, Quiros CF, Simon PW (1999) Carrots and related vegetable Umbelliferae. CABI  
578 Publishing, Wallingford, Oxon, UK: New York
- 579 Rubin DB (1987) Multiple imputation for nonresponse in surveys. Wiley, New York
- 580 Simon PW (2000) Domestication, historical development, and modern breeding of carrot. In:  
581 Janick J (ed) Plant breeding reviews. John Wiley & Sons, Inc., Hoboken, NJ, pp 157–190
- 582 Simon PW, Freeman RE, Vieira JV, et al (2008) Carrot. In: Prohens J, Nuez F (eds) Vegetables  
583 II: Fabaceae, Liliaceae, Solanaceae, and Umbelliferae. Springer, New York, NY, pp 327–  
584 357
- 585 Simon PW, Goldman IL (2007) Carrot. In: Singh RJ (ed) Genetic resources, chromosome  
586 engineering, and crop improvement. CRC Press, pp 497–516
- 587 Simon PW, Peterson CE, Lindsay RC (1982) Genotype, soil, and climate effects on sensory and  
588 objective components of carrot flavor. *J Amer Soc Hort Sci* 107:644–648.
- 589 Simon PW, Pollak L, Clevidence B, et al (2009) Plant breeding for human nutritional quality. In:  
590 Janick J (ed) Plant breeding reviews. John Wiley & Sons, Inc., Hoboken, NJ, pp 325–392
- 591 Solomons N (2012) Vitamin A. In: Erdman JW, Macdonald IA, Zeisel SH (eds) Present  
592 knowledge in nutrition, 10th edn. Wiley-Blackwell, Oxford, UK, pp 157–83
- 593 Sprague GF, Tatum LA (1942) General vs. specific combining ability in single crosses of corn.  
594 *Agron J* 34:923–932. doi: 10.2134/agronj1942.00021962003400100008x
- 595 Swanton CJ, O’Sullivan J, Robinson DE (2010) The critical weed-free period in carrot. *Weed*  
596 *Sci* 58:229–233. doi: 10.1614/WS-09-098.1
- 597 Thomas TH, Barnes A, Rankin WEF, Hole CC (1983) Dry matter distribution between the shoot  
598 and storage root of carrot (*Daucus carota* L.) II. effect of foliar application of gibberellic  
599 acid. *Ann Bot* 51:189–199.

- 600 Traka-Mavrona E (1996) Effects of competition on phenotypic expression and differentiation of  
601 five quality traits of carrot (*Daucus carota* L.) and their implications in breeding. *Sci*  
602 *Hortic* 65:335–340. doi: 10.1016/0304-4238(96)00884-9
- 603 USDA Economic Research Service (ERS) Food availability (per capita) data system. In: *Food*  
604 *Availab. Capita Data Syst.* [http://www.ers.usda.gov/data-products/food-availability-\(per-](http://www.ers.usda.gov/data-products/food-availability-(per-capita)-data-system/faqs.aspx)  
605 [capita\)-data-system/faqs.aspx](http://www.ers.usda.gov/data-products/food-availability-(per-capita)-data-system/faqs.aspx).
- 606 USDA National Agricultural Statistics Service (NASS) (2016) Quick stats database - statistics by  
607 subject. [https://www.nass.usda.gov/Statistics\\_by\\_Subject/result.php?9AF46B77-6FC6-](https://www.nass.usda.gov/Statistics_by_Subject/result.php?9AF46B77-6FC6-3021-8AB4-12312EEF4AF7&sector=CROPS&group=VEGETABLES&comm=CARROTS)  
608 [3021-8AB4-](https://www.nass.usda.gov/Statistics_by_Subject/result.php?9AF46B77-6FC6-3021-8AB4-12312EEF4AF7&sector=CROPS&group=VEGETABLES&comm=CARROTS)  
609 [12312EEF4AF7&sector=CROPS&group=VEGETABLES&comm=CARROTS](https://www.nass.usda.gov/Statistics_by_Subject/result.php?9AF46B77-6FC6-3021-8AB4-12312EEF4AF7&sector=CROPS&group=VEGETABLES&comm=CARROTS).
- 610 van Buuren S, Groothuis-Oudshoorn K (2011) mice: multivariate imputation by chained  
611 equations in R. *J Stat Softw* 45:1–67.
- 612 van Ginkel JR, Kroonenberg PM (2014) Analysis of variance of multiply imputed data. *Multivar*  
613 *Behav Res* 49:78–91. doi: 10.1080/00273171.2013.855890
- 614 van Heemst HDJ (1985) The influence of weed competition on crop yield. *Agric Syst* 18:81–93.  
615 doi: 10.1016/0308-521X(85)90047-2
- 616 Welch JE, Grimball EL (1947) Male sterility in the carrot. *Science* 106:594. doi:  
617 10.1126/science.106.2763.594
- 618 Zhang Y, Kang MS (1997) DIALLEL-SAS: a SAS program for Griffing’s diallel analyses.  
619 *Agron J* 89:176–182. doi: 10.2134/agronj1997.00021962008900020005x
- 620 Zystro JP, de Leon N, Tracy WF (2012) Analysis of traits related to weed competitiveness in  
621 sweet corn (*Zea mays* L.). *Sustainability* 4:543–560. doi: 10.3390/su4040543
- 622

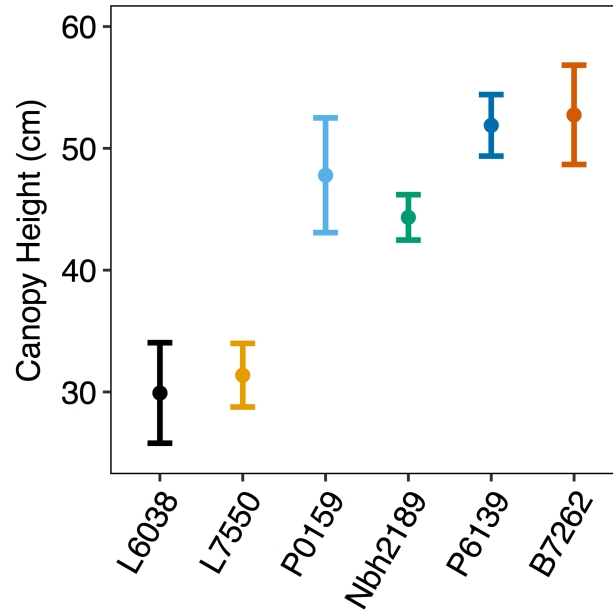

623

624 **Figure 1.** Variation in means and 95% confidence intervals for canopy height (130 DAP) among

625 carrot inbred lines used in this study.

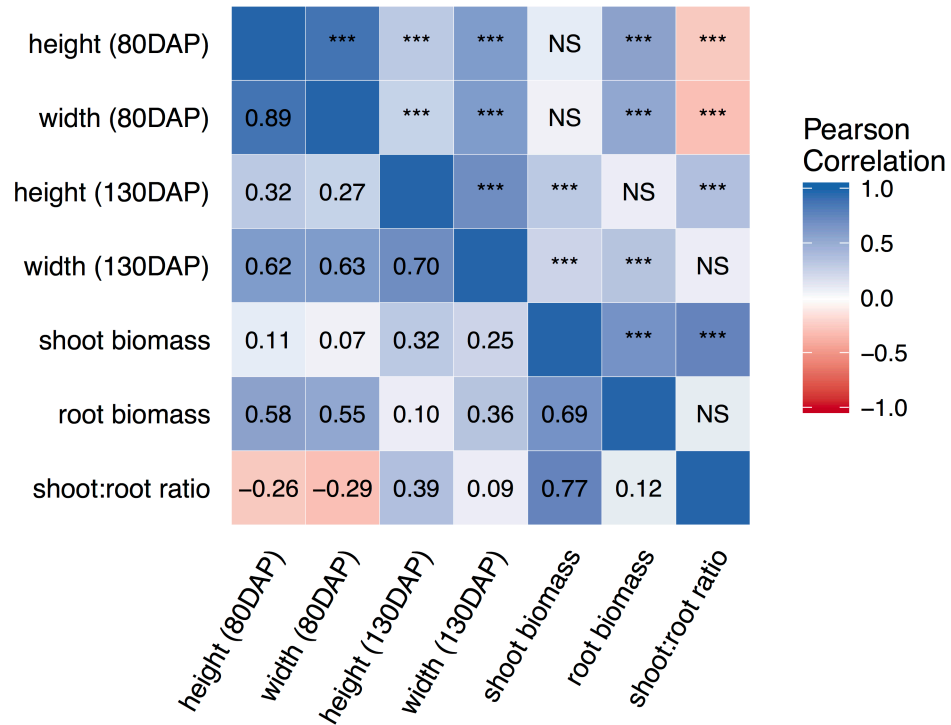

626

627 **Figure 2.** Pearson's correlations (lower diagonal) and significance (upper diagonal) among

628 carrot growth traits measured in this study. Significance codes: \*\*\*  $P \leq 0.001$ , \*\*  $P \leq 0.01$ , \*  $P \leq$

629 0.05, NS not significant.

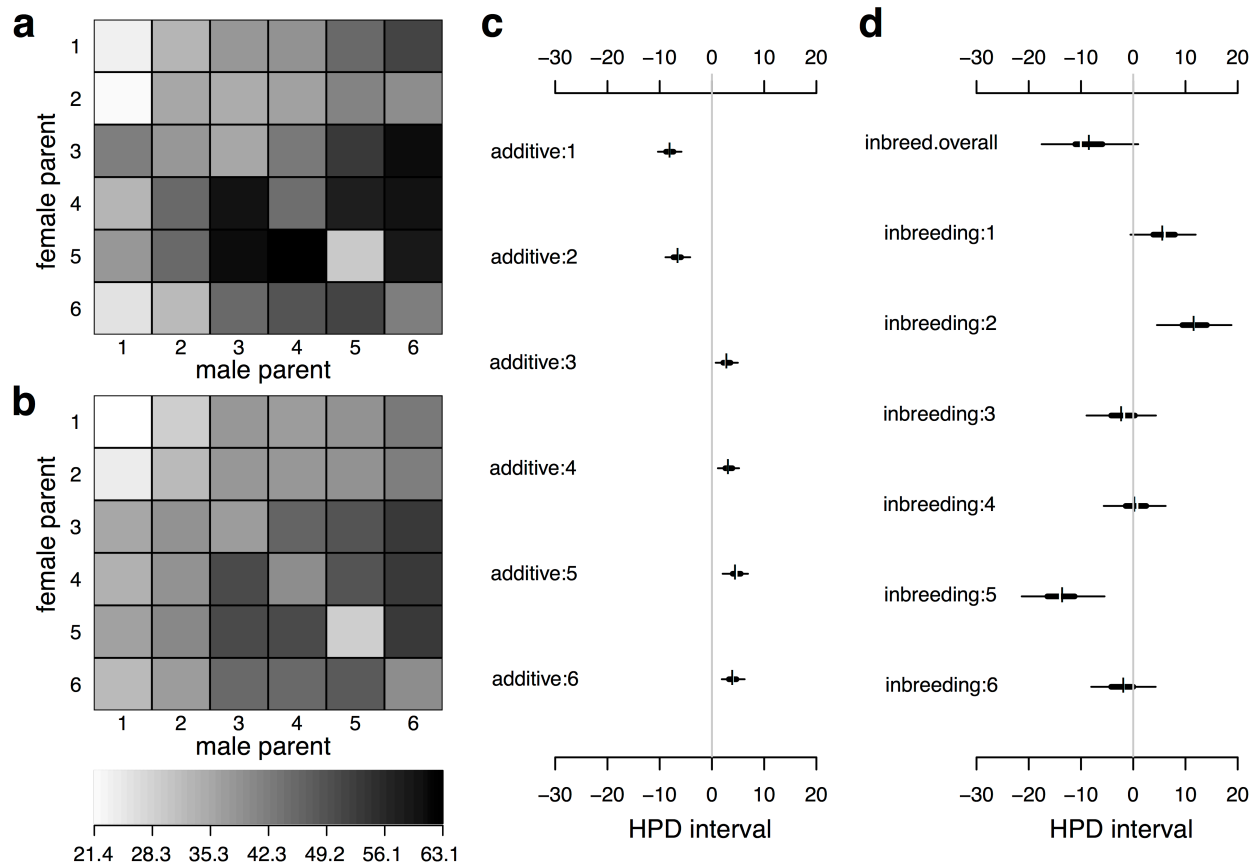

630

631

632 **Figure 3.** Diallel effects for carrot canopy height (cm) at 130 days after planting. **a** and **b** show  
 633 observed and predicted means, respectively. Shading indicates height on a scale from 21.4 cm  
 634 (lighter) to 63.1 cm (darker). Posterior predicted means in **b** are the result of fitting the model in  
 635 BayesDiallel to the data in **a**. The highest posterior density (HPD) intervals for additive effects  
 636 are shown in **c** and the HPD intervals for inbreeding effects are shown in **d**. For each effect, thin  
 637 and thick horizontal lines show the 95% and 50% HPD intervals, respectively, and the vertical  
 638 break displays the posterior mean. Key: 1 = L6038, 2 = L7550, 3 = P0159, 4 = Nbh2189, 5 =  
 639 P6139, 6 = B7262.

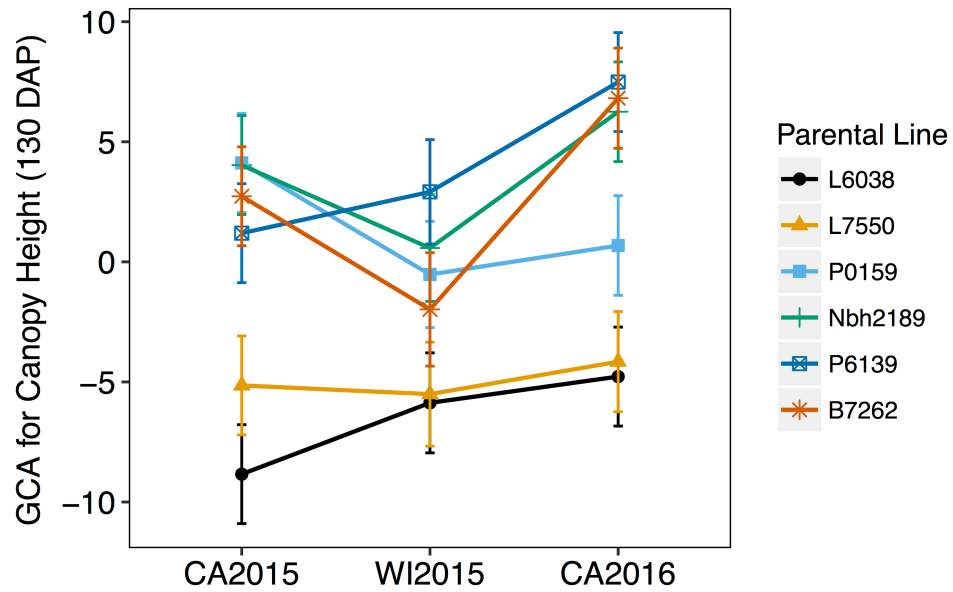

640

641

642 **Figure 4.** Interaction of general combining ability (GCA) and year (WI2015, CA2015, CA2016)

643 for canopy height at 130 DAP.

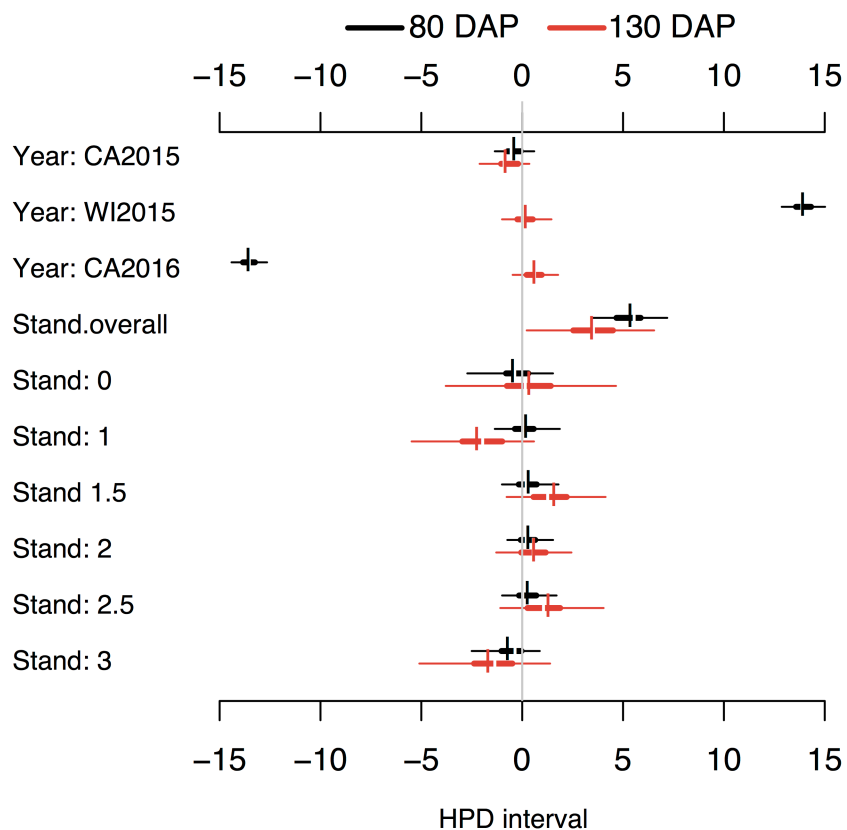

644

645 **Figure 5.** Highest posterior density (HPD) intervals of year and planting density (stand; 1-3  
646 scale, 1 = low, 3 = high) for canopy height at 80 DAP (black) and 130 DAP (red). For each  
647 effect, thin and thick horizontal lines show the 95% and 50% HPD intervals, respectively, and  
648 the vertical break displays the posterior mean.



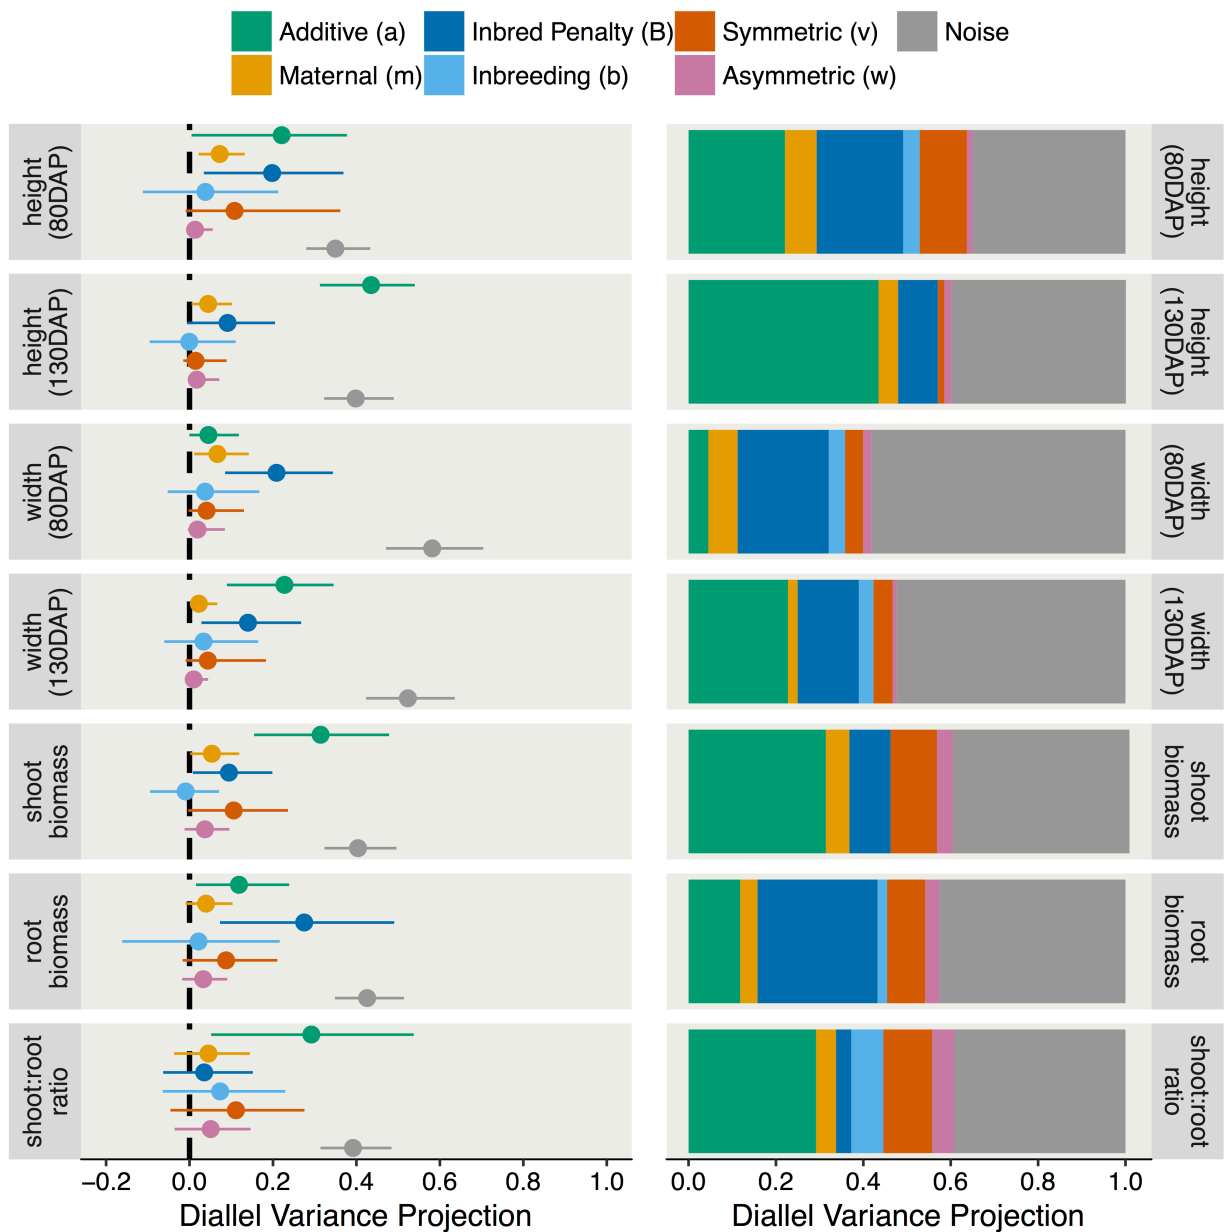

649

650 **Figure 6.** Diallel variance projections characterizing the genetic architecture for each trait,  
 651 including additive (a), maternal (m), overall inbreeding penalty (B), parent-specific inbreeding  
 652 (b), symmetric (v), and asymmetric (w) effect classes. **Left:** mean and 95% credibility intervals  
 653 of effect classes for each trait. **Right:** Mean values showing overall genetic architecture.

654 **Table 1.** Carrot traits evaluated, their range among parents, and number of complete observations for each environment in this study.

655

| Phenotype           | Measurement                      | Unit             | Parental range                           | Data Transformation | Number of complete observations <sup>a</sup> |        |        |
|---------------------|----------------------------------|------------------|------------------------------------------|---------------------|----------------------------------------------|--------|--------|
|                     |                                  |                  |                                          |                     | CA2015                                       | WI2015 | CA2016 |
| Canopy height       | Three points within the plot     | Centimeters (cm) | 29.9 – 52.8                              | None                | 72                                           | 50     | 69     |
| Canopy width        | Three points within the plot     | Centimeters (cm) | 41.5 – 61.3                              | None                | 72                                           | 50     | 69     |
| Shoot biomass       | Fresh and dry                    | Grams (g)        | 6.43 – 21.3 (fresh)<br>1.02 – 3.39 (dry) | ln(x)               | 72                                           | 49     | 68     |
| Root biomass        | Fresh and dry                    | Grams (g)        | 29.0 – 64.9 (fresh)<br>4.22 – 8.64 (dry) | ln(x)               | 72                                           | 49     | 68     |
| Shoot to root ratio | Shoot biomass/root biomass (dry) | Grams (g)        | 0.23 – 0.64                              | ln(x)               | 72                                           | 49     | 68     |

<sup>a</sup> 72 observations possible per environment (36 entries x 2 replications)

656 **Table 2.** Griffing's Method I, Model I ANOVA mean square values for carrot growth traits, including: canopy height and width (cm),  
 657 shoot biomass (g), root biomass (g), and the ratio of shoot:root biomass. The ratio of general combining ability (GCA) to specific  
 658 combining ability (SCA) variance is also reported.

659

| Source                | df  | Height      |             | Width        |             | Shoot Biomass <sup>a</sup> |          | Root Biomass <sup>a</sup> |           | Shoot:root ratio <sup>a</sup> |
|-----------------------|-----|-------------|-------------|--------------|-------------|----------------------------|----------|---------------------------|-----------|-------------------------------|
|                       |     | 80 DAP      | 130 DAP     | 80 DAP       | 130 DAP     | Fresh                      | Dry      | Fresh                     | Dry       |                               |
| <b>Genotype (G)</b>   | 35  | 331.34 ***  | 489.3 ***   | 353.57 ***   | 433.77 ***  | 1.8 ***                    | 2.13 *** | 0.76 ***                  | 0.91 ***  | 0.24 ***                      |
| <b>GCA</b>            | 5   | 516.06 ***  | 1488.95 *** | 363.35 ***   | 1024.37 *** | 7.27 ***                   | 8.55 *** | 1.13 ***                  | 1.74 ***  | 1.27 ***                      |
| <b>SCA</b>            | 15  | 393.69 ***  | 376.33 ***  | 362.43 ***   | 435.66 ***  | 0.95 ***                   | 1.21 *** | 1.11 ***                  | 1.3 ***   | 0.06 ***                      |
| <b>Reciprocal</b>     | 15  | 207.42 ***  | 269.07 ***  | 341.46 ***   | 235.02 ***  | 0.83 ***                   | 0.91 *** | 0.28 ***                  | 0.24 **   | 0.07 ***                      |
| <b>Year (E)</b>       | 2   | 10794.6 *** | 268.7 **    | 11668.22 *** | 944.08 ***  | 0.11                       | 2.06 *** | 17.8 ***                  | 19.71 *** | 0.27 ***                      |
| <b>G x E</b>          | 70  | 25.91 *     | 68.48 ***   | 55.6         | 64.74       | 0.26 ***                   | 0.28 **  | 0.12                      | 0.12      | 0.04 ***                      |
| <b>GCA x E</b>        | 10  | 39.72 *     | 134.49 ***  | 55.63        | 110.75 *    | 0.45 ***                   | 0.4 **   | 0.21 *                    | 0.2       | 0.08 ***                      |
| <b>SCA x E</b>        | 30  | 25.26 *     | 43.07       | 36.82        | 50.95       | 0.26 **                    | 0.31 **  | 0.14                      | 0.13      | 0.04 ***                      |
| <b>Reciprocal x E</b> | 30  | 21.96       | 71.88 **    | 74.37        | 63.2        | 0.19 *                     | 0.2      | 0.09                      | 0.09      | 0.02                          |
| <b>rep(E)</b>         | 3   | 24          | 12.49       | 56.44        | 106.03      | 0.1                        | 0.12     | 0.14                      | 0.15      | 0.01                          |
| <b>Error</b>          | 105 | 15.38       | 32.14       | 45.39        | 53.17       | 0.12                       | 0.14     | 0.09                      | 0.1       | 0.01                          |
| <b>GCA/SCA</b>        |     | 0.11        | 0.35        | 0.08         | 0.21        | 0.72                       | 0.65     | 0.09                      | 0.11      | 2.35                          |

\*\*\*  $P \leq 0.001$ , \*\*  $P \leq 0.01$ , \*  $P \leq 0.05$

<sup>a</sup> Natural log transformation; measured at harvest (130 DAP)

660 **Table 3.** Pooled estimates of general combining ability (GCA) for carrot growth traits combined across all growing environments.

| Parent            | Height |          | Width  |         | Biomass <sup>a</sup> |         |                  |
|-------------------|--------|----------|--------|---------|----------------------|---------|------------------|
|                   | 80 DAP | 130 DAP  | 80 DAP | 130 DAP | Shoot                | Root    | Shoot:root ratio |
| <b>L6038</b>      | -1.39  | -6.5***  | 0.09   | -3.5**  | -0.53***             | -0.19*  | -0.19***         |
| <b>L7550</b>      | -2.83  | -4.94*** | -0.63  | -2.23   | -0.15                | -0.03   | -0.08**          |
| <b>P0159</b>      | 0.85   | 1.43     | -1.56  | -1.41   | 0.39***              | 0.27*** | 0.1***           |
| <b>Nbh2189</b>    | 2.43   | 3.62**   | 3.15   | 7.13*** | 0.11                 | 0.06    | 0.03             |
| <b>P6139</b>      | 3.52*  | 3.87**   | 1.86   | 0.53    | -0.15                | -0.07   | -0.03            |
| <b>B7262</b>      | -2.58  | 2.52*    | -2.92  | -0.53   | 0.33***              | -0.03   | 0.18***          |
| <b>Grand Mean</b> | 32.27  | 45.77    | 43.57  | 53.74   | 1.55                 | 2.55    | 0.6              |

\*\*\*  $P \leq 0.001$ , \*\*  $P \leq 0.01$ , \*  $P \leq 0.05$

<sup>a</sup> Natural log transformation; dry weight as measured at harvest (130 DAP)

661

662 **Table 4.** Pooled estimates of specific combining ability (SCA) for carrot growth traits combined  
 663 across all growing environments.

664

| F1 hybrids            | Height    |           | Width     |           | Biomass <sup>a</sup> |          |                  |
|-----------------------|-----------|-----------|-----------|-----------|----------------------|----------|------------------|
|                       | 80 DAP    | 130 DAP   | 80 DAP    | 130 DAP   | Shoot                | Root     | Shoot:root ratio |
| L6038 x L7550         | -0.53     | -0.75     | -1.4      | -2.27     | 0.1                  | 0        | 0.06             |
| L6038 x P0159         | 1.05      | 1.83      | 1.82      | 2.86      | 0.12                 | 0.17     | 0.05             |
| L6038 x Nbh2189       | 1.01      | -2.03     | 0.45      | -2.62     | -0.24                | -0.06    | -0.1*            |
| L6038 x P6139         | 1.66      | 0.96      | -0.8      | 2.43      | 0.21                 | 0.15     | 0.06             |
| L6038 x B7262         | 2.05      | 0.95      | 4.62      | 2.67      | -0.06                | 0.09     | -0.04            |
| L7550 x P0159         | -1.08     | -1.75     | -1.91     | 0.61      | 0.1                  | 0.19     | -0.01            |
| L7550 x Nbh2189       | 0.48      | -0.63     | -1.97     | -0.28     | 0.28                 | 0.04     | 0.09             |
| L7550 x P6139         | 0.34      | 0.68      | 0.01      | -0.76     | -0.05                | -0.03    | 0.01             |
| L7550 x B7262         | -3.43     | -2.92     | 0.96      | -1.45     | 0.33*                | 0.39***  | 0                |
| P0159 x Nbh2189       | 1.46      | 1.77      | 1.38      | 0.23      | 0.09                 | 0.28**   | -0.05            |
| P0159 x P6139         | 4.04*     | 4.99*     | 3.95      | 1.24      | -0.14                | -0.04    | -0.05            |
| P0159 x B7262         | 4.39**    | 2.93      | 4.28      | 4.79*     | -0.12                | -0.09    | -0.08            |
| Nbh2189 x P6139       | 5.57***   | 6.26**    | 7.01**    | 7.2**     | 0.17                 | 0.12     | 0.05             |
| Nbh2189 x B7262       | -5.45***  | 0.6       | -1.66     | 1.7       | 0.54***              | 0.3**    | 0.08             |
| P6139 x B7262         | 2.32      | 3.17      | 2.73      | 5*        | -0.22                | -0.04    | -0.09*           |
| <b>Parental selfs</b> |           |           |           |           |                      |          |                  |
| L6038                 | -5.24*    | -1.97     | -4.58     | -3.73     | -0.16                | -0.33*   | -0.03            |
| L7550                 | 2.35      | 4.31      | 1.74      | 3.14      | -0.44*               | -0.38**  | -0.08            |
| P0159                 | -13.12*** | -12.06*** | -10.72**  | -11.63**  | -0.43*               | -0.83*** | 0.1              |
| Nbh2189               | -6.40**   | -4.48     | -9.11**   | -8.38*    | -0.47*               | -0.52*** | 0.01             |
| P6139                 | -18.85*** | -19.93*** | -16.83*** | -19.55*** | -0.15                | -0.34*   | -0.01            |
| B7262                 | -3.42     | -6.22     | -8.6*     | -10.37**  | -0.81***             | -0.88*** | 0.05             |

\*\*\*  $P \leq 0.001$ , \*\*  $P \leq 0.01$ , \*  $P \leq 0.05$

<sup>a</sup> Natural log transformation; dry weight as measured at harvest (130 DAP)

665

666 **Table 5.** Pooled estimates of reciprocal cross effects for carrot growth traits over all growing  
 667 environments.  
 668

| F1 hybrids      | Height   |          | Width    |         | Biomass <sup>a</sup> |         |                  |
|-----------------|----------|----------|----------|---------|----------------------|---------|------------------|
|                 | 80 DAP   | 130 DAP  | 80 DAP   | 130 DAP | Shoot                | Root    | Shoot:root ratio |
| L6038 x L7550   | 4***     | 4.35**   | 4.51*    | 5.25**  | -0.1                 | -0.08   | -0.02            |
| L6038 x P0159   | -0.91    | -2.21    | -3.37    | -2.62   | 0.19                 | 0.12    | 0.05             |
| L6038 x Nbh2189 | 2.97**   | 2.43     | 2.22     | 3.74*   | 0.12                 | 0.05    | 0.03             |
| L6038 x P6139   | 2.96**   | 2.76     | 3.01     | 3.61*   | -0.01                | 0.1     | -0.03            |
| L6038 x B7262   | 7.18***  | 9.93***  | 8.75***  | 7.14*** | -0.15                | -0.06   | -0.06            |
| L7550 x P0159   | -2.89**  | -1.61    | -3.44    | 0.32    | 0.58***              | 0.28*** | 0.14***          |
| L7550 x Nbh2189 | -7.17*** | -4.3     | -9.45*** | -5.42*  | 0.77***              | 0.36*** | 0.22***          |
| L7550 x P6139   | -4.58*** | -1.5     | -7.17*** | -4.13*  | 0.03                 | 0.04    | 0.01             |
| L7550 x B7262   | -0.24    | 2.46     | 1.4      | 1.04    | 0.11                 | 0.15    | -0.02            |
| P0159 x Nbh2189 | -1.5     | -6.63*** | -3.29    | -2.81   | 0.04                 | 0.04    | 0.01             |
| P0159 x P6139   | -4.72*** | -2.96    | -6.78*** | -4.24*  | -0.01                | -0.01   | 0.01             |
| P0159 x B7262   | 3.18**   | 6.74***  | 1.31     | 4.09*   | -0.07                | -0.03   | 0.01             |
| Nbh2189 x P6139 | 0.81     | -1.92    | -0.97    | -0.82   | 0                    | 0.07    | -0.02            |
| Nbh2189 x B7262 | 6.14***  | 7.35**   | 7.15**   | 8.75*** | -0.28*               | -0.09   | -0.08*           |
| P6139 x B7262   | 3.96***  | 2.58     | 5.39**   | 1.71    | -0.01                | -0.06   | 0                |

\*\*\*  $P \leq 0.001$ , \*\*  $P \leq 0.01$ , \*  $P \leq 0.05$

<sup>a</sup> Natural log transformation; dry weight as measured at harvest (130 DAP)

669 **Table 6.** Diallel variance projection (VarP) for carrot growth traits. Under each trait (column) is listed the predicted percentage and  
670 95% credibility intervals of variance that would be attributable to each class of effect. Predictions are conditional on a future complete  
671 diallel composed of the same parental lines.  
672

| Diallel inheritance class | Height                 |                        | Width                 |                        | Biomass <sup>a</sup>   |                        |                        |
|---------------------------|------------------------|------------------------|-----------------------|------------------------|------------------------|------------------------|------------------------|
|                           | 80 DAP                 | 130 DAP                | 80 DAP                | 130 DAP                | Shoot                  | Root                   | Shoot:root ratio       |
| Additive (a)              | 22.07<br>(0.49,37.72)  | 43.49<br>(31.24,53.98) | 4.56<br>(-0.04,11.83) | 22.75<br>(8.96,34.53)  | 31.43<br>(15.47,47.83) | 11.84<br>(1.55,23.9)   | 29.21<br>(5.18,53.73)  |
| Parent of origin (m)      | 7.24<br>(2.15,13.23)   | 4.48<br>(0.49,10.19)   | 6.67<br>(1.12,14.21)  | 2.22<br>(0.14,6.66)    | 5.37<br>(0.14,11.93)   | 3.95<br>(-0.98,10.31)  | 4.55<br>(-3.68,14.49)  |
| Overall inbreeding (B)    | 19.8<br>(3.43,36.9)    | 9.1<br>(-0.57,20.49)   | 20.87<br>(8.54,34.36) | 13.98<br>(2.85,26.76)  | 9.44<br>(0.82,19.86)   | 27.48<br>(7.3,49.06)   | 3.51<br>(-6.33,15.18)  |
| Inbreeding (b)            | 3.79<br>(-11.2,21.29)  | -0.08<br>(-9.57,11.05) | 3.74<br>(-5.23,16.75) | 3.37<br>(-6.07,16.45)  | -0.91<br>(-9.46,7.08)  | 2.17<br>(-16.12,21.62) | 7.34<br>(-6.41,22.94)  |
| Symmetric epistasis (v)   | 10.82<br>(-0.93,36.13) | 1.44<br>(-1.49,8.87)   | 4.09<br>(-0.24,13.07) | 4.36<br>(-0.95,18.33)  | 10.6<br>(-0.34,23.6)   | 8.73<br>(-1.67,21.04)  | 11.12<br>(-4.57,27.55) |
| Asymmetric epistasis (w)  | 1.32<br>(-0.46,5.57)   | 1.73<br>(-0.2,7.15)    | 1.92<br>(-0.38,8.46)  | 1<br>(-0.1,4.46)       | 3.68<br>(-1.19,9.57)   | 3.27<br>(-1.8,9.05)    | 5.08<br>(-3.58,14.62)  |
| Total variance explained  | 65.03<br>(56.69,72.02) | 60.15<br>(51.04,67.74) | 41.85<br>(29.6,52.9)  | 47.69<br>(36.41,57.67) | 59.62<br>(50.38,67.66) | 57.43<br>(48.6,65.16)  | 60.81<br>(51.58,68.61) |
| Unexplained variance      | 34.97<br>(27.98,43.31) | 39.85<br>(32.26,48.96) | 58.15<br>(47.1,70.4)  | 52.31<br>(42.33,63.59) | 40.38<br>(32.34,49.62) | 42.57<br>(34.84,51.4)  | 39.19<br>(31.39,48.42) |

<sup>a</sup> Natural log transformation; dry weight as measured at harvest (130 DAP)

673 **LIST OF SUPPLEMENTARY FIGURES**

- 674 **Figure S1.** Carrot inbred lines used as parents in this study.
- 675 **Figure S2.** Parental means and 95% confidence intervals for all traits.
- 676 **Figure S3.** Incidence of missing data by replication and year for canopy height (130 DAP).
- 677 **Figure S4.** Convergence of imputed Markov chain Monte Carlo (MCMC) chains for all traits.
- 678 **Figure S5.** Distributions of observed and imputed values for all traits.
- 679 **Figure S6.** Distributions of observed and imputed values for selected traits by year.
- 680 **Figures S7-12.** Observed and predicted means for each trait evaluated.
- 681 **Figures S13-19.** Highest posterior density (HPD) intervals of inheritance classes for each trait  
682 evaluated.
- 683 **Figure S20.** Highest posterior density (HPD) intervals of random effect classes for all traits  
684 evaluated.



685  
686  
687  
688  
689  
690  
691  
692  
693  
694  
695  
696  
697

## LIST OF SUPPLEMENTARY TABLES

**Table S1.** Pooled results of Griffing's ANOVA (Method I, Model I) for multiply imputed data of carrot growth traits.

**Table S2.** Estimates of general combining ability (GCA) by year (CA2015, WI2015, CA2016) for carrot growth traits with significant genotype by environment interactions (GxE) and significant GCAxE interactions.

**Table S3.** Estimates of specific combining ability (SCA) by year (CA2015, WI2015, CA2016) for carrot growth traits with significant genotype by environment interactions (GxE) and significant SCAxE interactions.

**Table S4.** Estimates of reciprocal effects by year (CA2015, WI2015, CA2016) for carrot growth traits with significant genotype by environment interactions (GxE) and significant ReciprocalxE interactions.
